# Supplementary material
Source: HighWire-hosted journal article supplement (https://jnm.snmjournals.org/highwire/filestream/94261/field_highwire_adjunct_files/0/91009_Supplemental_Data.pdf)
Supplement: 91009_Supplemental_Data.pdf [file 91009_Supplemental_Data.pdf]

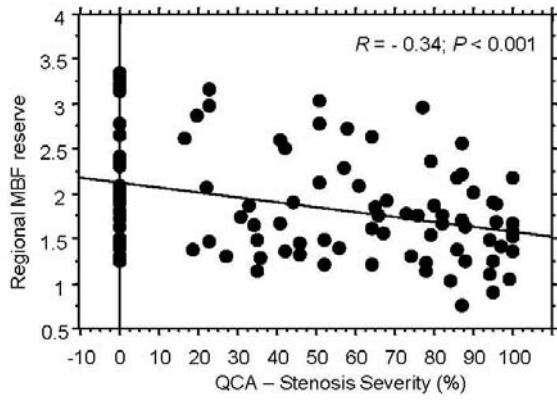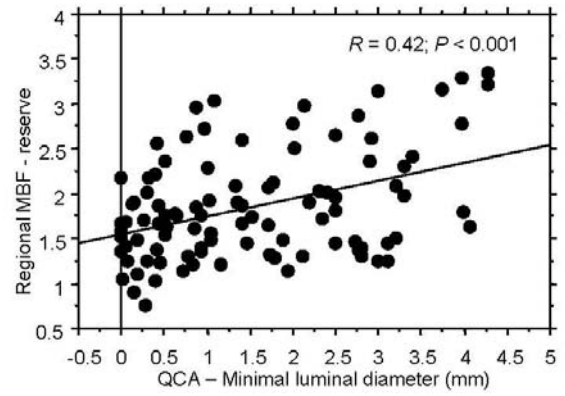

**Supplemental Fig. 1** Stenosis severity (%) and coronary minimal luminal diameter (mm) vs downstream myocardial blood flow (MBF) reserve in patients (N = 32) submitted to quantitative coronary angiography (QCA)
